# Supplementary material for: Unique Patterns of Mating Pheromone Presence and Absence could Result in the Ambiguous Sexual Behaviours of Colletotrichum Species
Source: Research Square preprint supplement (doi:10.21203/rs.3.rs-112807/v1), 2020-11-24
Supplement: Supplementary file 1 [file 752c9dcb70bd93d34f8d8128.xlsx]

## Sheet: Table S4
Table S4 Accessions of genes used for phylogenetic analyses
Species	act	chs1	GAPDH	his3	sod2	tub
acutatum species complex
C. nymphaeae	*	*	*	*	*	*
C. simmondsii	JQ949597	JQ948937	JQ948606	JQ949267	*	JQ949927
C. costaricense	*	*	*	*	*	*
C. paranaense	*	*	*	*	*	*
C. lupini	JQ949476	JQ948816	JQ948485	JQ949146	*	JQ949806
C. tamarilloi	*	*	*	*	*	*
C. cuscutae	JQ949516	JQ948856	JQ948525	JQ949186	*	JQ949846
C. melonis	*	*	*	*	*	*
C. abscissum	*	*	*	*	*	*
C. fioriniae	*	*	*	*	*	*
C. phormii	*	*	*	*	*	*
C. salicis	JQ949781	JQ949121	JQ948791	JQ949451	*	JQ950111
C. godetiae	*	*	*	*	*	*
C. acutatum	*	*	*	*	*	*
caudatum species complex
C. somersetense	*	*	*	*	JX076880	*
C. caudatum	*	*	*	*	*	*
C. zoysiae	*	*	*	*	*	*
graminicola species complex
C. navitas	JQ005832	JQ005790	*	JQ005811	GQ919073	JQ005853
C. graminicola	*	*	*	*	*	*
C. sublineola	JQ005834	JQ005792	*	JQ005813	*	JQ005855
C. eremochloae	JX519236	JX519228	*	*	*	JX519245
C. falcatum	*	*	*	*	*	*
C. cereale	*	*	*	*	*	*
spaethianum species complex
C. tofieldiae	*	*	*	*	*	*
C. incanum	*	*	*	*	*	*
destructivum species complex
C. higginsianum	*	*	*	*	*	*
C. shisoi	*	*	*	*	*	*
C. tanaceti	*	*	*	*	*	*
No assigned complex
C. orchidophilum	*	*	*	*	*	*
C. coccodes	*	*	*	*	*	*
C. chlorophyti	*	*	*	*	*	*
gloeosporioides species complex
C. fructicola	*	*	*	*	*	*
C. asianum	*	*	*	*	*	*
C. camelliae	*	*	*	*		*
C. gloeosporioides	*	*	*	*	*	*
boninense species complex
C. karsti	*	*	*	*	*	*
C. sansevieriae	*	*	*	*	*	*
truncatum species complex
C. truncatum (1)	*	*	*	*	*	*
C. truncatum (2) (previously C. capsici)	KJN002 (LC170517.1)	*	*	*	*	*
orcidearum species complex
C. musicola	*	*	*	*	*	*
C. pluvivorum	*	*	*	*	*	*
C. sojae	*	*	*	*	*	*
orbiculare species complex
C. sidae	*	*	*	*	*	*
C. orbiculare	*	*	*	*	*	*
C. trifolii	*	*	*	*	*	*
C. spinosum	*	*	*	*	*	*
Verticillium (Outgroup)
V. tricorpus	*	*	*	*	*	*
*: When the relevant sequence from the appropriate strain was not available on a public database and was thus extracted from the genome used in this study
